# Supplementary material for: Molecular subtyping improves breast cancer diagnosis in the Copenhagen Breast Cancer Genomics Study
Source: JCI journal article supplement (doi:10.1172/jci.insight.178114), 2024-04-07

**Supplementary table 1 – CIT256 subtype by tumour size**

| Characteristic     | LumA, N = 905 | LumB, N = 442 | Normal like, N = 556 | Basal like, N = 328 | mAPO, N = 180 | LumC, N = 357 | p-value |
|--------------------|---------------|---------------|----------------------|---------------------|---------------|---------------|---------|
| <b>Tumour size</b> |               |               |                      |                     |               |               | <0.001  |
| T1                 | 566 (38%)     | 186 (13%)     | 375 (25%)            | 131 (8.8%)          | 70 (4.7%)     | 155 (10%)     |         |
| T2                 | 276 (28%)     | 200 (20%)     | 115 (12%)            | 168 (17%)           | 76 (7.8%)     | 142 (15%)     |         |
| T3                 | 33 (20%)      | 27 (16%)      | 36 (22%)             | 20 (12%)            | 18 (11%)      | 32 (19%)      |         |
| T4                 | 30 (21%)      | 29 (20%)      | 30 (21%)             | 9 (6.3%)            | 16 (11%)      | 28 (20%)      |         |

**Supplementary table 2 – PAM50 subtype by tumour size**

| Characteristic     | LumA, N = 1,047 | LumB, N = 605 | Normal like, N = 403 | Basal like, N = 428 | HER2 enriched, N = 285 | p-value |
|--------------------|-----------------|---------------|----------------------|---------------------|------------------------|---------|
| <b>Tumour size</b> |                 |               |                      |                     |                        | <0.001  |
| T1                 | 689 (46%)       | 290 (20%)     | 217 (15%)            | 175 (12%)           | 112 (7.6%)             |         |
| T2                 | 277 (28%)       | 244 (25%)     | 125 (13%)            | 212 (22%)           | 119 (12%)              |         |
| T3                 | 38 (23%)        | 36 (22%)      | 38 (23%)             | 22 (13%)            | 32 (19%)               |         |
| T4                 | 43 (30%)        | 35 (25%)      | 23 (16%)             | 19 (13%)            | 22 (15%)               |         |

**Supplementary table 3 – logistic regression model, odds of discordance in IHC luminal patients.**

|                    | OR   | 95% CI    | P-value |
|--------------------|------|-----------|---------|
| <b>Age ≥ 60</b>    |      |           |         |
| Yes                | —    | —         |         |
| No                 | 1.60 | 1.22-2.10 | <0.001  |
| <b>Stage</b>       |      |           |         |
| Stage I-III        | —    | —         |         |
| Stage IV           | 2.91 | 1.30-6.14 | 0.006   |
| <b>Grade</b>       |      |           |         |
| I                  | —    | —         |         |
| II                 | 2.56 | 1.81-3.70 | <0.001  |
| III                | 15.5 | 9.36-26.0 | <0.001  |
| <b>Lymph nodes</b> |      |           |         |
| N0-2               | —    | —         |         |
| N3                 | 1.96 | 1.07-3.46 | 0.024   |

OR: Odds Ratio, CI: Confidence Interval.  
 Excluded patients with unknown malignancy grade (n=100)

**Supplementary table 4** – risk groups with modelled risk. Dotted line represents suggested cutpoint. G: Grade

|                             | <b>Risk %</b> | <b>N</b> |                             | <b>Observed concordant</b> | <b>Observed discordant</b> |
|-----------------------------|---------------|----------|-----------------------------|----------------------------|----------------------------|
| ≥ 60, Stage I-III, G1, N0-2 | 5.0           | 400      |                             |                            |                            |
| < 60, Stage I-III, G1, N0-2 | 7.7           | 245      |                             |                            |                            |
| ≥ 60, Stage I-III, G1, N3   | 9.3           | 5        |                             |                            |                            |
| ≥ 60, Stage I-III, G2, N0-2 | 11.8          | 628      | <b>Predicted concordant</b> | 1174                       | 111                        |
| ≥ 60, Stage IV, G1, N0-2    | 13.2          | 3        |                             |                            |                            |
| < 60, Stage I-III, G1, N3   | 14.1          | 4        |                             |                            |                            |
| < 60, Stage I-III, G2, N0-2 | 17.6          | 476      |                             |                            |                            |
| < 60, Stage IV, G1, N0-2    | 19.6          | 3        |                             |                            |                            |
| ≥ 60, Stage I-III, G2, N3   | 20.8          | 31       |                             |                            |                            |
| ≥ 60, Stage IV, G1, N3      | 23.0          | 1        |                             |                            |                            |
| ≥ 60, Stage IV, G2, N0-2    | 28.0          | 8        |                             |                            |                            |
| < 60, Stage I-III, G2, N3   | 29.6          | 20       |                             |                            |                            |
| < 60, Stage IV, G2, N0-2    | 38.4          | 12       | <b>Predicted discordant</b> | 494                        | 162                        |
| ≥ 60, Stage IV, G2, N3      | 43.3          | 3        |                             |                            |                            |
| ≥ 60, Stage I-III, G3, N0-2 | 44.8          | 36       |                             |                            |                            |
| < 60, Stage IV, G2, N3      | 55.0          | 3        |                             |                            |                            |
| < 60, Stage I-III, G3, N0-2 | 56.5          | 61       |                             |                            |                            |
| < 60, Stage I-III, G3, N3   | 71.8          | 2        |                             |                            |                            |

**Supplementary figure 1 – Sankey diagram of the correlation between PAM50 and CIT256**

Supp. fig. 1

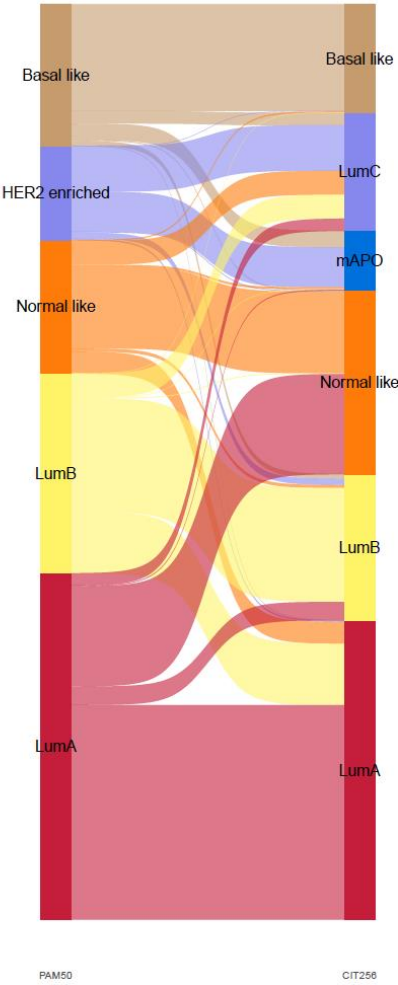

**Supplementary figure 2 -5-year survival rates by stage and intrinsic molecular subtype**

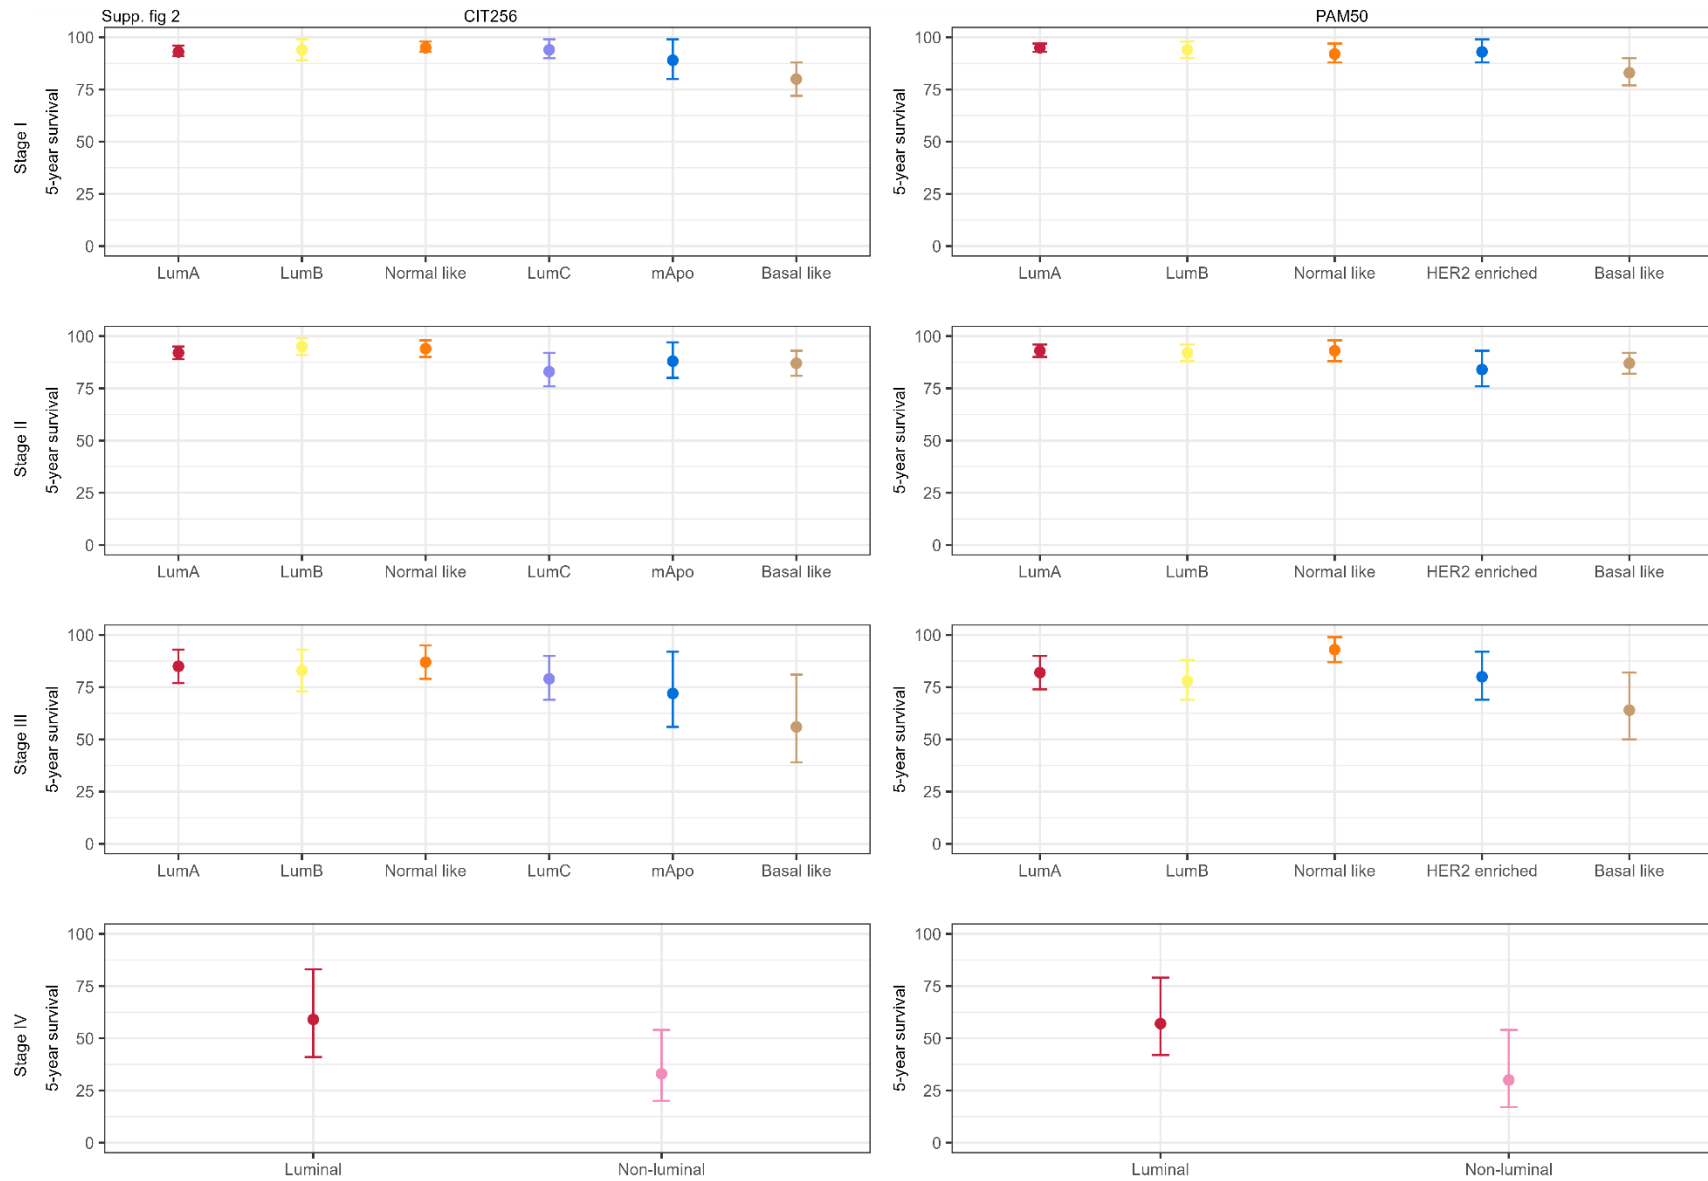

Supplement: sd1 [file 1]
